## Addendum

## Addendum: Hyperprogression and impact of tumor growth kinetics after PD1/PDL1 inhibition in head and neck squamous cell carcinoma

**Andy Karabajakian<sup>1</sup>, Thibaut Garrivier<sup>2</sup>, Carole Crozes<sup>3</sup>, Nicolas Gadot<sup>4</sup>, Jean-Yves Blay<sup>1</sup>, Frédéric Bérard<sup>5</sup>, Philippe Céruse<sup>6</sup>, Philippe Zrounba<sup>7</sup>, Pierre Saintigny<sup>4</sup>, Charles Mastier<sup>2</sup> and Jérôme Fayette<sup>1</sup>**

<sup>1</sup>Department of Medical Oncology, Centre Léon Bérard, Lyon, France

<sup>2</sup>Department of Radiology, Centre Léon Bérard, Lyon, France

<sup>3</sup>Department of Pathology, Centre Léon Bérard, Lyon, France

<sup>4</sup>Department of Translational Research and Innovation, Centre Léon Bérard, Lyon, France

<sup>5</sup>Department of Allergology and Clinical Immunology, CHU Lyon-Sud, Pierre-Bénite, France

<sup>6</sup>Department of Head and Neck Surgery, Hôpital Universitaire de la Croix-Rousse, Lyon, France

<sup>7</sup>Department of Head and Neck Surgery, Centre Léon Bérard, Lyon, France

**Published:** December 06, 2022

**Copyright:** ©2022 Karabajakian et al. This is an open access article distributed under the terms of the [Creative Commons Attribution License](https://creativecommons.org/licenses/by/3.0/) (CC BY 3.0), which permits unrestricted use, distribution, and reproduction in any medium, provided the original author and source are credited.

**This article has an addendum:** Patient consent was obtained from the patient. This study was approved by the ethical review board of Centre Léon-Bérard.

Original article: Oncotarget. 2020; 11:1618–1628. <https://doi.org/10.18632/oncotarget.27563>
